# Supplementary material for: Discovery of a Novel MHC Class I Lineage in Teleost Fish which Shows Unprecedented Levels of Ectodomain Deterioration while Possessing an Impressive Cytoplasmic Tail Motif
Source: Cells. 2019 Sep 9;8(9):1056. doi: 10.3390/cells8091056 (PMC6769792; doi:10.3390/cells8091056)
Supplement: Supplementary file 1 [file cells-08-01056-s001.zip]

Archive with 5 entries (5 files):
- Supplementary Figure S1. ML tree.pdf
- Supplementary Table S1. Genomes, genomic locations and expressed match.docx
- Supplementary Text S1. Deduced amino acid sequences.docx
- Supplementary Text S2. Mexican tetra HAA RT-PCR.docx
- Supplementary Text S3. Substitution rates.docx
